# Supplementary material for: Towards an equitable future of global photovoltaic waste recycling
Source: Research Square preprint supplement (doi:10.21203/rs.3.rs-6661667/v1), 2025-05-28
Supplement: Supplementary file 1 [file a6f49c03427d85f6fdfd23cc.pdf]

## **Supplementary Information for**

### **Towards an equitable future of global photovoltaic waste recycling**

Chen Wang<sup>a,f</sup>, Jian Zuo<sup>b,f</sup>, Yu Xin<sup>a</sup>, Xi Liu<sup>a</sup>, Peipei Tian<sup>a</sup>, Pengfei Yuan<sup>a</sup>, Ruidong Chang<sup>b</sup>, Jing Li<sup>c</sup>, Kuishuang Feng<sup>d</sup>, John Laurence Esguerra<sup>e</sup>, Jiashuo Li<sup>a,\*</sup>

a. Institute of Blue and Green Development, Shandong University, Weihai 264209, China

b. School of Architecture and Civil Engineering, The University of Adelaide, Adelaide, 5005, Australia

c. College of Economics and Management, Taiyuan University of Technology, Taiyuan, 030024, PR China

d. Department of Geographical Sciences, University of Maryland, College Park, MD, USA

e. Department of Management and Engineering, Linköping University, Linköping, Sweden

f. C.W. and J.Z. contributed equally to this study

\*Correspondence: J.L. ([lijiashuo@sdu.edu.cn](mailto:lijiashuo@sdu.edu.cn))

## Table for Contents

|                                                                                                                        |    |
|------------------------------------------------------------------------------------------------------------------------|----|
| Supplementary Note S1 Comparison of global PV waste projection .....                                                   | 3  |
| Supplementary Note S2 Variance analysis of recycling benefits .....                                                    | 4  |
| Supplementary Note S3 Calculation of recycling subsidy in various scenarios .....                                      | 5  |
| Supplementary Table S1. Solar PV installed capacity in 2000-2005(unit: GW). .....                                      | 8  |
| Supplementary Table S2. Solar PV installed capacity in 2006-2011(unit: GW). .....                                      | 10 |
| Supplementary Table S3. Solar PV installed capacity in 2012-2017(unit: GW). .....                                      | 12 |
| Supplementary Table S4. Solar PV installed capacity in 2020-2022(unit: GW). .....                                      | 14 |
| Supplementary Table S5. Capacity factor in GCAM .....                                                                  | 6  |
| Supplementary Table S6. Income groups and included regions according to World Bank's<br>classification .....           | 17 |
| Supplementary Table S7. The region classification used in the GCAM model .....                                         | 18 |
| Supplementary Table S8. The region classification used in the GCAM model .....                                         | 20 |
| Supplementary Table S9. Input and output flows associated with the mechanical recycling<br>processes of PV waste. .... | 22 |
| Supplementary Table S10. Input and output flows associated with the chemical recycling<br>processes of PV waste. ....  | 24 |
| Supplementary Table S11. Input and output flows associated with the thermal recycling<br>processes of PV waste. ....   | 26 |
| Supplementary Table S12. Unit recycling cost of mechanical recycling technology (Unit:<br>US\$/ton). ....              | 28 |
| Supplementary Table S13. Unit recycling cost of chemical technology (Unit: US\$/ton). ....                             | 29 |
| Supplementary Table S14. Unit recycling cost of thermal technology (Unit: US\$/ton). ....                              | 30 |
| Supplementary Table S15. Unit recycling benefits of three technologies (Unit: US\$/ton). ....                          | 31 |
| Supplementary Table S16. PV module learning rate .....                                                                 | 32 |

## Supplementary Note S1 Comparison of global PV waste projection

This study projects that cumulative global PV waste will reach approximately 93–115 Mt by 2050 (Figure 1). These values are higher than earlier projections reported in the International Renewable Energy Agency (IRENA) 2016 study (<https://www.irena.org/publications/2016/Jun/End-of-life-management-Solar-Photovoltaic-Panels>), i.e. 60–78 Mt. The discrepancy is mainly due to the more conservative assumptions by IRENA on the annual growth rates of PV installation (2.5%–8.9% post-2015). In fact, the actual global PV capacity has grown at an average annual rate of around 26% over the past decade <sup>1</sup>. Consequently, earlier studies likely underestimated both the scale of future PV deployment and the resulting volumes of PV waste.

However, our projections are significantly lower than those in the latest IRENA 2022 report (<https://www.irena.org/publications/2022/Mar/World-Energy-Transitions-Outlook-2022>), which projects up to 212 Mt of cumulative PV waste by 2050 under a 1.5°C-compatible pathway, with global PV capacity reaching 14,036 GW. By contrast, our study projects a maximum of 13,334 GW by 2050. This lower capacity projection reflects the exclusion of 1.5°C-aligned energy transition scenarios, as numerous studies have suggested that achieving such a pathway remains highly unlikely globally. Therefore, the lower projected PV deployment in our analysis directly leads to a more conservative projection of PV waste volumes.

This also explains the lower economic benefits from PV recycling projected in this study than those under a 1.5°C scenario. Our study projects that by 2050, global PV recycling revenues will remain below USD 11 billion, whereas IRENA's 2024 webinar (Wired for Circularity – Securing the Power Grids of the Future<sup>2</sup>) presented projections as high as USD 20 billion under 1.5°C-aligned scenarios.

In summary, our study provides a more conservative projection of global PV waste generation and associated economic benefits, taking into account the current challenges in meeting the 1.5°C energy transition target.

## Supplementary Note S2 Variance analysis of recycling benefits

To evaluate regional inequity in recycling benefits, we calculated the variance of economic and environmental benefits across 30 regions for each scenario. For a given scenario  $j$ . The variance  $\sigma_j^2$  is computed as:

$$\sigma_j^2 = \frac{1}{n} \sum_i^n (B_{ij} - \bar{B}_j)^2 \quad (1)$$

where  $B_{ij}$  represents the benefit (economic or environmental) of region  $i$ , and  $\bar{B}_j$  denote the average benefit across all  $n=30$  regions.

To facilitate comparison across scenarios, these variances were normalized to the range  $[0, 1]$  using min-max normalization. The normalized variance  $\sigma_j^{2*}$  is computed as:

$$\sigma_j^{2*} = \frac{\sigma_j^2 - \sigma_{min}^2}{\sigma_{max}^2 - \sigma_{min}^2} \quad (2)$$

Where  $\sigma_{min}^2$  and  $\sigma_{max}^2$  represents the minimum and maximum variances among all scenarios, respectively. This normalized variance reflects the relative level of inequality in each scenario, where 0 represents the least variance (highest equity) and 1 represents the greatest variance (highest inequity).

In addition, to assess the impact of subsidy policies on reducing regional disparities in recycling benefits, we calculated the variance in unit net recycling benefits (e.g., US\$/ton) across the 30 regions both before and after subsidy implementation. The variance in unit net recycling benefits is computed as:

$$\sigma_{pre}^2 = \frac{1}{n} \sum_i^n (N_i^{pre} - \bar{N}^{pre})^2 \quad (3)$$

$$\sigma_{post}^2 = \frac{1}{n} \sum_i^n (N_i^{post} - \bar{N}^{post})^2 \quad (4)$$

Where  $N_i^{pre}$  and  $N_i^{post}$  denote the unit net benefits in region  $i$  before and after subsidies, respectively, and  $\bar{N}^{pre}$  and  $\bar{N}^{post}$  denote their corresponding means.

### Supplementary Note S3 Calculation of recycling subsidy in various scenarios

To promote stakeholder participation and avoid the spatial concentration of PV recycling industries, we designed four subsidy scenarios for photovoltaic (PV) waste recycling: (1) Continuous subsidy scenario, (2) Declining subsidy scenario, (3) Low-carbon price scenario, and (4) High-carbon price scenario. For the carbon pricing scenarios, we adopt the Stated Policies Scenario and the Announced Pledges Scenario from IEA's report (<https://www.iea.org/reports/world-energy-outlook-2024>) as proxies for low- and high-carbon price pathways, respectively.

#### S6.1 Continuous subsidy scenario

In this scenario, the government subsidizes a fixed proportion of the total recycling cost to reduce the initial financial burden on recycling companies and stimulate infrastructure investment.

$$Subsidy_{cont} = \alpha \times TC_{total} \quad (5)$$

Where  $\alpha$  is the subsidy rate, randomly sampled from a uniform distribution between 0.01 and 0.15 in Monte Carlo simulations.  $TC_{total}$  is the recycling total cost (USD/ton).  $Subsidy_{cont}$  is the subsidy received (USD/ton).

#### S6.2 Declining subsidy scenario

In this scenario, subsidies decrease gradually once the project breaks even. The annual reduction rate  $r$  starts at 0.1 in the first year after break-even and increases by 0.1 each year until it reaches 1.0, at which point the subsidy is phased out completely.

$$Subsidy_{decline,t} = \beta_t \times P_{price} \times Total\ PV \quad (6)$$

$$\beta_t = \begin{cases} \beta_0, & \text{if } t \leq t_{break-even} \\ \beta_{t-1} \times (1 - r_t), & \text{if } t > t_{break-even}, r_t \in \{0.1, 0.2, \dots, 1\} \end{cases} \quad (7)$$

Where  $\beta_0$  is the initial subsidy rate, randomly sampled from a uniform distribution between 0.15 and 0.20 in Monte Carlo simulations.  $\beta_{t-1}$  is the subsidy rate in year  $t$ .

$P_{price}$  is the sales price of PV modules (USD/ton).  $Total\ PV$  refers to the volume of PV waste generated.  $r_t$  is the annual reduction rate in year  $t$ , increasing by 0.1 per year starting from 0.1.  $t_{break-even}$  is the year when recycling reaches break-even.

#### S6.3 Carbon price subsidy scenario

These scenarios evaluate environmental benefits from recycling based on avoided carbon emissions, which are monetized using region-specific carbon prices (Extended Data Table 3).

$$Subsidy_{carbon} = \gamma \times E_{avoided} \quad (8)$$

Where  $\gamma$  is the regional carbon price (USD/tCO<sub>2</sub>).  $E_{avoided}$  is the amount of avoided carbon emissions from PV recycling (tCO<sub>2</sub>-eq/ton).

Supplementary Table S1. Capacity factor in GCAM

| GCAM Region                     | Utility-scale PV | Distributed PV |
|---------------------------------|------------------|----------------|
| USA                             | 0.2              | 0.17           |
| Africa_Eastern                  | 0.28236          | 0.24           |
| Africa_Northern                 | 0.28019          | 0.23816        |
| Africa_Southern                 | 0.27554          | 0.23421        |
| Africa_Western                  | 0.27357          | 0.23253        |
| Australia_NZ                    | 0.27252          | 0.23164        |
| Brazil                          | 0.24671          | 0.2097         |
| Canada                          | 0.12978          | 0.11031        |
| Central America and Caribbean   | 0.25133          | 0.21363        |
| Central Asia                    | 0.21567          | 0.18247        |
| China                           | 0.23988          | 0.2039         |
| EU-12                           | 0.16551          | 0.14069        |
| EU-15                           | 0.18318          | 0.1557         |
| Europe_Eastern                  | 0.16287          | 0.13844        |
| Europe_Non_EU                   | 0.21953          | 0.1866         |
| European Free Trade Association | 0.1099           | 0.09341        |
| India                           | 0.24736          | 0.21025        |
| Indonesia                       | 0.23176          | 0.19699        |
| Japan                           | 0.18912          | 0.16075        |
| Mexico                          | 0.26843          | 0.22816        |
| Middle East                     | 0.27372          | 0.23266        |
| Pakistan                        | 0.25961          | 0.22067        |
| Russia                          | 0.13021          | 0.11068        |
| South Africa                    | 0.27614          | 0.23472        |
| South America_Northern          | 0.24307          | 0.20661        |
| South America_Southern          | 0.24065          | 0.20456        |
| South Asia                      | 0.25478          | 0.21656        |
| South Korea                     | 0.20922          | 0.17784        |
| Southeast Asia                  | 0.23772          | 0.20206        |
| Argentina                       | 0.23285          | 0.19792        |

|          |         |         |
|----------|---------|---------|
| Colombia | 0.21884 | 0.18601 |
|----------|---------|---------|

---

**Note:** The original regions in the GCAM model include EU-15 and EU-12. We combine them into a single region, EU-27.

Supplementary Table S2. Solar PV installed capacity in 2000-2005(unit: GW).

| GCAM Region                          | 2000 | 2001 | 2002 | 2003 | 2004 | 2005 |
|--------------------------------------|------|------|------|------|------|------|
| Africa_Eastern                       | 0.0  | 0.0  | 0.0  | 0.0  | 0.0  | 0.0  |
| Africa_Northern                      | 0.0  | 0.0  | 0.0  | 0.0  | 0.0  | 0.0  |
| Africa_Southern                      | 0.0  | 0.0  | 0.0  | 0.0  | 0.0  | 0.0  |
| Africa_Western                       | 0.0  | 0.0  | 0.0  | 0.0  | 0.0  | 0.0  |
| Argentina                            | 0.0  | 0.0  | 0.0  | 0.0  | 0.0  | 0.0  |
| Australia_NZ                         | 0.0  | 0.0  | 0.0  | 0.0  | 0.0  | 0.1  |
| Brazil                               | 0.0  | 0.0  | 0.0  | 0.0  | 0.0  | 0.0  |
| Canada                               | 0.0  | 0.0  | 0.0  | 0.0  | 0.0  | 0.0  |
| Central America<br>and the Caribbean | 0.0  | 0.0  | 0.0  | 0.0  | 0.0  | 0.0  |
| Central Asia                         | 0.0  | 0.0  | 0.0  | 0.0  | 0.0  | 0.0  |
| China                                | 0.0  | 0.0  | 0.0  | 0.0  | 0.0  | 0.1  |
| Colombia                             | 0.0  | 0.0  | 0.0  | 0.0  | 0.0  | 0.0  |
| EU-27                                | 0.2  | 0.3  | 0.3  | 0.6  | 1.3  | 2.3  |
| Europe_Eastern                       | 0.0  | 0.0  | 0.0  | 0.0  | 0.0  | 0.0  |
| Europe_Non_EU                        | 0.0  | 0.0  | 0.0  | 0.0  | 0.0  | 0.0  |
| European Free<br>Trade Association   | 0.0  | 0.0  | 0.0  | 0.0  | 0.0  | 0.0  |
| India                                | 0.0  | 0.0  | 0.0  | 0.0  | 0.0  | 0.0  |
| Indonesia                            | 0.0  | 0.0  | 0.0  | 0.0  | 0.0  | 0.0  |
| Japan                                | 0.3  | 0.5  | 0.6  | 0.9  | 1.1  | 1.4  |
| Mexico                               | 0.0  | 0.0  | 0.0  | 0.0  | 0.0  | 0.0  |
| Middle East                          | 0.0  | 0.0  | 0.0  | 0.0  | 0.0  | 0.0  |
| Pakistan                             | 0.0  | 0.0  | 0.0  | 0.0  | 0.0  | 0.0  |
| Russia                               | 0.0  | 0.0  | 0.0  | 0.0  | 0.0  | 0.0  |
| South Africa                         | 0.0  | 0.0  | 0.0  | 0.0  | 0.0  | 0.0  |
| South<br>America_Northern            | 0.0  | 0.0  | 0.0  | 0.0  | 0.0  | 0.0  |
| South<br>America_Southern            | 0.0  | 0.0  | 0.0  | 0.0  | 0.0  | 0.0  |



|                |     |     |     |     |     |     |
|----------------|-----|-----|-----|-----|-----|-----|
| South Asia     | 0.0 | 0.0 | 0.0 | 0.0 | 0.0 | 0.0 |
| South Korea    | 0.0 | 0.0 | 0.0 | 0.0 | 0.0 | 0.0 |
| Southeast Asia | 0.0 | 0.0 | 0.0 | 0.0 | 0.0 | 0.0 |
| USA            | 0.2 | 0.2 | 0.3 | 0.3 | 0.4 | 0.5 |
| Total          | 0.8 | 1.0 | 1.3 | 1.8 | 2.9 | 4.4 |

**Note:** The specific countries included in each GCAM region can be found in Supplementary Table S7.

Supplementary Table S3. Solar PV installed capacity in 2006-2011(unit: GW).

| GCAM Region                          | 2006 | 2007 | 2008 | 2009 | 2010 | 2011 |
|--------------------------------------|------|------|------|------|------|------|
| Africa_Eastern                       | 0.0  | 0.0  | 0.0  | 0.0  | 0.0  | 0.0  |
| Africa_Northern                      | 0.0  | 0.0  | 0.0  | 0.0  | 0.0  | 0.0  |
| Africa_Southern                      | 0.0  | 0.0  | 0.0  | 0.0  | 0.0  | 0.0  |
| Africa_Western                       | 0.0  | 0.0  | 0.0  | 0.0  | 0.0  | 0.0  |
| Argentina                            | 0.0  | 0.0  | 0.0  | 0.0  | 0.0  | 0.0  |
| Australia_NZ                         | 0.1  | 0.1  | 0.1  | 0.3  | 1.1  | 2.5  |
| Brazil                               | 0.0  | 0.0  | 0.0  | 0.0  | 0.0  | 0.0  |
| Canada                               | 0.0  | 0.0  | 0.0  | 0.1  | 0.2  | 0.6  |
| Central America<br>and the Caribbean | 0.0  | 0.0  | 0.0  | 0.0  | 0.1  | 0.1  |
| Central Asia                         | 0.0  | 0.0  | 0.0  | 0.0  | 0.0  | 0.0  |
| China                                | 0.1  | 0.1  | 0.1  | 0.3  | 0.9  | 3.1  |
| Colombia                             | 0.0  | 0.0  | 0.0  | 0.0  | 0.0  | 0.0  |
| EU-27                                | 3.2  | 5.0  | 10.4 | 16.7 | 30.0 | 53.1 |
| Europe_Eastern                       | 0.0  | 0.0  | 0.0  | 0.0  | 0.0  | 0.2  |
| Europe_Non_EU                        | 0.0  | 0.0  | 0.0  | 0.0  | 0.0  | 0.0  |
| European Free<br>Trade Association   | 0.0  | 0.0  | 0.1  | 0.1  | 0.1  | 0.2  |
| India                                | 0.0  | 0.0  | 0.0  | 0.0  | 0.0  | 0.5  |
| Indonesia                            | 0.0  | 0.0  | 0.0  | 0.0  | 0.0  | 0.0  |
| Japan                                | 1.7  | 1.9  | 2.1  | 2.6  | 3.6  | 4.9  |
| Mexico                               | 0.0  | 0.0  | 0.0  | 0.0  | 0.0  | 0.0  |
| Middle East                          | 0.0  | 0.0  | 0.0  | 0.0  | 0.1  | 0.2  |
| Pakistan                             | 0.0  | 0.0  | 0.0  | 0.0  | 0.0  | 0.0  |
| Russia                               | 0.0  | 0.0  | 0.0  | 0.0  | 0.0  | 0.0  |
| South Africa                         | 0.0  | 0.0  | 0.0  | 0.0  | 0.0  | 0.0  |
| South<br>America_Northern            | 0.0  | 0.0  | 0.0  | 0.0  | 0.0  | 0.0  |
| South<br>America_Southern            | 0.0  | 0.0  | 0.0  | 0.0  | 0.0  | 0.0  |
| South Asia                           | 0.0  | 0.0  | 0.0  | 0.0  | 0.0  | 0.0  |

|                |     |     |      |      |      |      |
|----------------|-----|-----|------|------|------|------|
| South Korea    | 0.0 | 0.1 | 0.4  | 0.5  | 0.7  | 0.7  |
| Southeast Asia | 0.0 | 0.0 | 0.0  | 0.0  | 0.1  | 0.1  |
| USA            | 0.7 | 1.0 | 1.2  | 1.6  | 2.9  | 5.2  |
| Total          | 5.9 | 8.3 | 14.4 | 22.5 | 39.8 | 71.5 |

**Note:** The specific countries included in each GCAM region can be found in Supplementary Table S7.

Supplementary Table S4. Solar PV installed capacity in 2012-2017(unit: GW).

| GCAM Region                          | 2012 | 2013 | 2014 | 2015 | 2016  | 2017  |
|--------------------------------------|------|------|------|------|-------|-------|
| Africa_Eastern                       | 0.0  | 0.0  | 0.0  | 0.0  | 0.0   | 0.1   |
| Africa_Northern                      | 0.0  | 0.0  | 0.0  | 0.0  | 0.3   | 0.5   |
| Africa_Southern                      | 0.0  | 0.0  | 0.0  | 0.0  | 0.0   | 0.1   |
| Africa_Western                       | 0.0  | 0.0  | 0.0  | 0.0  | 0.1   | 0.2   |
| Argentina                            | 0.0  | 0.0  | 0.0  | 0.0  | 0.0   | 0.0   |
| Australia_NZ                         | 3.8  | 4.6  | 5.3  | 6.0  | 6.7   | 7.4   |
| Brazil                               | 0.0  | 0.0  | 0.0  | 0.0  | 0.1   | 1.2   |
| Canada                               | 0.8  | 1.2  | 1.8  | 2.5  | 2.7   | 2.9   |
| Central America and<br>the Caribbean | 0.1  | 0.2  | 0.2  | 0.8  | 0.9   | 1.2   |
| Central Asia                         | 0.0  | 0.0  | 0.0  | 0.1  | 0.1   | 0.1   |
| China                                | 6.7  | 17.9 | 28.7 | 44.1 | 78.7  | 132.2 |
| Colombia                             | 0.0  | 0.0  | 0.0  | 0.0  | 0.0   | 0.0   |
| EU-27                                | 70.8 | 80.3 | 86.8 | 94.9 | 101.0 | 106.5 |
| Europe_Eastern                       | 0.4  | 0.7  | 0.8  | 0.8  | 1.0   | 1.3   |
| Europe_Non_EU                        | 0.0  | 0.1  | 0.1  | 0.3  | 0.9   | 3.5   |
| European Free Trade<br>Association   | 0.4  | 0.8  | 1.1  | 1.4  | 1.7   | 2.0   |
| India                                | 0.8  | 1.2  | 3.1  | 4.9  | 9.0   | 17.1  |
| Indonesia                            | 0.0  | 0.0  | 0.0  | 0.0  | 0.0   | 0.1   |
| Japan                                | 6.6  | 13.6 | 23.3 | 34.2 | 42.0  | 49.5  |
| Mexico                               | 0.1  | 0.1  | 0.2  | 0.3  | 0.6   | 1.1   |
| Middle East                          | 0.3  | 0.5  | 0.7  | 0.9  | 1.4   | 2.0   |
| Pakistan                             | 0.0  | 0.1  | 0.2  | 0.3  | 0.6   | 0.6   |
| Russia                               | 0.0  | 0.0  | 0.0  | 0.1  | 0.1   | 0.2   |
| South Africa                         | 0.0  | 0.3  | 1.1  | 1.3  | 2.0   | 3.1   |
| South<br>America_Northern            | 0.0  | 0.0  | 0.0  | 0.1  | 0.1   | 0.1   |
| South<br>America_Southern            | 0.1  | 0.1  | 0.3  | 0.8  | 1.3   | 2.3   |

|                |       |       |       |       |       |       |
|----------------|-------|-------|-------|-------|-------|-------|
| South Asia     | 0.0   | 0.0   | 0.0   | 0.0   | 0.1   | 0.2   |
| South Korea    | 1.0   | 1.6   | 2.6   | 3.8   | 4.9   | 6.4   |
| Southeast Asia | 0.4   | 1.0   | 1.6   | 2.0   | 3.8   | 4.3   |
| USA            | 8.1   | 12.0  | 16.4  | 22.5  | 33.7  | 42.0  |
| Total          | 100.7 | 136.1 | 174.5 | 222.0 | 293.8 | 388.2 |

**Note:** The specific countries included in each GCAM region can be found in Supplementary Table S7.

Supplementary Table S5. Solar PV installed capacity in 2020-2022(unit: GW).

| GCAM Region                          | 2018  | 2019  | 2020  | 2021  | 2022  |
|--------------------------------------|-------|-------|-------|-------|-------|
| Africa_Eastern                       | 0.2   | 0.2   | 0.3   | 0.3   | 0.5   |
| Africa_Northern                      | 1.3   | 2.2   | 2.2   | 2.3   | 2.4   |
| Africa_Southern                      | 0.1   | 0.3   | 0.3   | 0.4   | 0.7   |
| Africa_Western                       | 0.3   | 0.4   | 0.4   | 0.5   | 0.7   |
| Argentina                            | 0.2   | 0.4   | 0.8   | 1.1   | 1.1   |
| Australia_NZ                         | 11.5  | 16.3  | 21.0  | 25.9  | 29.9  |
| Brazil                               | 2.4   | 4.6   | 8.3   | 14.2  | 24.1  |
| Canada                               | 3.1   | 3.3   | 3.6   | 4.6   | 5.3   |
| Central America and<br>the Caribbean | 1.6   | 2.1   | 2.4   | 2.9   | 3.2   |
| Central Asia                         | 0.3   | 0.7   | 1.1   | 1.4   | 1.8   |
| China                                | 177.4 | 208.3 | 258.8 | 313.7 | 401.7 |
| Colombia                             | 0.0   | 0.0   | 0.1   | 0.2   | 0.4   |
| EU-27                                | 114.6 | 130.9 | 149.1 | 174.8 | 208.4 |
| Europe_Eastern                       | 2.2   | 6.1   | 7.5   | 8.2   | 8.4   |
| Europe_Non_EU                        | 5.2   | 6.1   | 6.9   | 8.1   | 9.9   |
| European Free Trade<br>Association   | 2.2   | 2.6   | 3.1   | 3.8   | 4.6   |
| India                                | 26.0  | 33.7  | 37.9  | 48.0  | 61.1  |
| Indonesia                            | 0.0   | 0.1   | 0.1   | 0.2   | 0.2   |
| Japan                                | 56.2  | 63.2  | 71.9  | 78.4  | 83.1  |
| Mexico                               | 2.6   | 4.7   | 6.7   | 8.2   | 9.3   |
| Middle East                          | 3.0   | 5.5   | 7.0   | 9.2   | 12.5  |
| Pakistan                             | 0.7   | 0.7   | 0.8   | 1.1   | 1.2   |
| Russia                               | 0.5   | 1.3   | 1.4   | 1.7   | 1.8   |
| South Africa                         | 4.4   | 4.4   | 5.5   | 5.8   | 5.8   |
| South<br>America_Northern            | 0.1   | 0.1   | 0.1   | 0.1   | 0.1   |
| South<br>America_Southern            | 2.8   | 3.3   | 3.9   | 5.1   | 6.9   |
| South Asia                           | 0.3   | 0.4   | 0.6   | 1.0   | 1.1   |

|                |       |       |       |       |        |
|----------------|-------|-------|-------|-------|--------|
| South Korea    | 8.9   | 12.7  | 17.3  | 21.3  | 24.1   |
| Southeast Asia | 4.9   | 10.5  | 23.1  | 24.1  | 26.6   |
| USA            | 50.2  | 59.8  | 74.7  | 93.9  | 111.5  |
| Total          | 483.0 | 585.2 | 716.7 | 860.4 | 1048.5 |

**Note:** The specific countries included in each GCAM region can be found in Supplementary Table S14.





Supplementary Table S6. Income groups and included regions according to World Bank's classification

| Income group  | Regions                                                                                                                                                                          |
|---------------|----------------------------------------------------------------------------------------------------------------------------------------------------------------------------------|
| High-income   | Australia_NZ, Canada, Europe_Non_EU, USA, European Free Trade Association, EU-27, South Korea, Japan                                                                             |
| Middle-income | Mexico, Central America and the Caribbean, Brazil, South America_Northern, South America_Southern, Colombia, Argentina, South Africa, Russia, Middle East, China, Southeast Asia |
| Low- income   | Europe_Eastern, Africa_Eastern, Africa_Northern, Africa_Southern, Africa_Western, India, Indonesia, South Asia, Central Asia, Pakistan                                           |

Supplementary Table S7. The region classification used in the GCAM model

| GCAM Region                   | Countries or sub-regions in the region                                                                                                                                                                                                                                                                                                                                                                                                                                                                                                                                            |
|-------------------------------|-----------------------------------------------------------------------------------------------------------------------------------------------------------------------------------------------------------------------------------------------------------------------------------------------------------------------------------------------------------------------------------------------------------------------------------------------------------------------------------------------------------------------------------------------------------------------------------|
| Australia_NZ                  | Australia, New Zealand                                                                                                                                                                                                                                                                                                                                                                                                                                                                                                                                                            |
| South Asia                    | Afghanistan, Bangladesh, Bhutan, Sri Lanka, Maldives, Nepal                                                                                                                                                                                                                                                                                                                                                                                                                                                                                                                       |
| Japan                         | Japan                                                                                                                                                                                                                                                                                                                                                                                                                                                                                                                                                                             |
| South Korea                   | South Korea                                                                                                                                                                                                                                                                                                                                                                                                                                                                                                                                                                       |
| Southeast Asia                | American Samoa, Brunei Darussalam, Cocos (Keeling) Islands, Cook Islands, Christmas Island, Fiji, Federated States of Micronesia, Guam, Cambodia, Kiribati, Lao Peoples Democratic Republic, Marshall Islands, Myanmar, Northern Mariana Islands, Malaysia, Mayotte, New Caledonia, Norfolk Island, Niue, Nauru, Pacific Islands Trust Territory, Pitcairn Islands, Philippines, Palau, Papua New Guinea, Democratic Peoples Republic of Korea, French Polynesia, Singapore, Solomon Islands, Seychelles, Thailand, Tokelau, Timor Leste, Tonga, Tuvalu, Viet Nam, Vanuatu, Samoa |
| Central Asia                  | Armenia, Azerbaijan, Georgia, Kazakhstan, Kyrgyzstan, Mongolia, Tajikistan, Turkmenistan, Uzbekistan                                                                                                                                                                                                                                                                                                                                                                                                                                                                              |
| India                         | India                                                                                                                                                                                                                                                                                                                                                                                                                                                                                                                                                                             |
| China                         | China                                                                                                                                                                                                                                                                                                                                                                                                                                                                                                                                                                             |
| Pakistan                      | Pakistan                                                                                                                                                                                                                                                                                                                                                                                                                                                                                                                                                                          |
| Indonesia                     | Indonesia                                                                                                                                                                                                                                                                                                                                                                                                                                                                                                                                                                         |
| Canada                        | Canada                                                                                                                                                                                                                                                                                                                                                                                                                                                                                                                                                                            |
| USA                           | United States                                                                                                                                                                                                                                                                                                                                                                                                                                                                                                                                                                     |
| Mexico                        | Mexico                                                                                                                                                                                                                                                                                                                                                                                                                                                                                                                                                                            |
| Central America and Caribbean | Aruba, Anguilla, Netherlands Antilles, Antigua & Barbuda, Bahamas, Belize, Bermuda, Barbados, Costa Rica, Cuba, Cayman Islands, Dominica, Dominican Republic, Guadeloupe, Grenada, Guatemala, Honduras, Haiti, Jamaica, Saint Kitts and Nevis, Saint Lucia, Montserrat, Martinique, Nicaragua, Panama, El Salvador, Trinidad and Tobago, Saint Vincent and the Grenadines                                                                                                                                                                                                         |

---

|                                 |                                                                                                                                                                                                                                                                                                  |
|---------------------------------|--------------------------------------------------------------------------------------------------------------------------------------------------------------------------------------------------------------------------------------------------------------------------------------------------|
| EU-27                           | Bulgaria, Cyprus, Czech Republic, Estonia, Hungary, Lithuania, Latvia, Malta, Poland, Romania, Slovakia, Slovenia, Andorra, Austria, Belgium, Denmark, Finland, France, Germany, Greece, Greenland, Ireland, Italy, Luxembourg, Monaco, Netherlands, Portugal, Sweden, Spain, United Kingdom     |
| Europe_Non_EU                   | Albania, Bosnia and Herzegovina, Croatia, Macedonia, Montenegro, Serbia, Turkey                                                                                                                                                                                                                  |
| European Free Trade Association | Iceland, Norway, Switzerland                                                                                                                                                                                                                                                                     |
| Europe_Eastern                  | Belarus, Moldova, Ukraine                                                                                                                                                                                                                                                                        |
| Russia                          | Russia                                                                                                                                                                                                                                                                                           |
| Africa_Eastern                  | Burundi, Comoros, Djibouti, Eritrea, Ethiopia, Kenya, Madagascar, Mauritius, Reunion, Rwanda, Sudan, Somalia, Uganda                                                                                                                                                                             |
| Africa_Northern                 | Algeria, Egypt, Western Sahara, Libya, Morocco, Tunisia                                                                                                                                                                                                                                          |
| Africa_Southern                 | Angola, Botswana, Lesotho, Mozambique, Malawi, Namibia, Swaziland, Tanzania, Zambia, Zimbabwe                                                                                                                                                                                                    |
| Africa_Western                  | Benin, Burkina Faso, Central African Republic, Cote d'Ivoire, Cameroon, Democratic Republic of the Congo, Congo, Cape Verde, Gabon, Ghana, Guinea, Gambia, Guinea-Bissau, Equatorial Guinea, Liberia, Mali, Mauritania, Niger, Nigeria, Senegal, Sierra Leone, Sao Tome and Principe, Chad, Togo |
| South Africa                    | South Africa                                                                                                                                                                                                                                                                                     |
| Argentina                       | Argentina                                                                                                                                                                                                                                                                                        |
| Brazil                          | Brazil                                                                                                                                                                                                                                                                                           |
| Colombia                        | Colombia                                                                                                                                                                                                                                                                                         |
| South America_Northern          | French Guiana, Guyana, Suriname, Venezuela                                                                                                                                                                                                                                                       |
| South America_Southern          | Bolivia, Chile, Ecuador, Peru, Paraguay, Uruguay                                                                                                                                                                                                                                                 |
| Middle East                     | United Arab Emirates, Bahrain, Iran, Iraq, Israel, Jordan, Kuwait, Lebanon, Oman, Palestine, Qatar, Saudi Arabia, Syria, Yemen                                                                                                                                                                   |

---

Supplementary Table S8. The region classification used in the GCAM model

| Year | Weight-to-power<br>ratio(t/GW) | Year | Weight-to-power<br>ratio(t/GW) |
|------|--------------------------------|------|--------------------------------|
| 2000 | 109863.0                       | 2031 | 55393.7                        |
| 2001 | 106660.9                       | 2032 | 54043.5                        |
| 2002 | 103769.5                       | 2033 | 52801.7                        |
| 2003 | 101188.9                       | 2034 | 51640.1                        |
| 2004 | 98919.0                        | 2035 | 50554.0                        |
| 2005 | 97000.0                        | 2036 | 49543.4                        |
| 2006 | 95672.7                        | 2037 | 48608.4                        |
| 2007 | 94977.2                        | 2038 | 47736.2                        |
| 2008 | 94767.7                        | 2039 | 46850.6                        |
| 2009 | 94169.9                        | 2040 | 45939.0                        |
| 2010 | 93038.0                        | 2041 | 45001.3                        |
| 2011 | 91372.0                        | 2042 | 44037.5                        |
| 2012 | 89171.9                        | 2043 | 43061.0                        |
| 2013 | 86437.8                        | 2044 | 42152.1                        |
| 2014 | 83392.3                        | 2045 | 41324.0                        |
| 2015 | 80258.4                        | 2046 | 40576.8                        |
| 2016 | 77036.0                        | 2047 | 39910.5                        |
| 2017 | 73725.1                        | 2048 | 39325.1                        |
| 2018 | 70325.8                        | 2049 | 38820.6                        |
| 2019 | 67333.5                        | 2050 | 38397.0                        |
| 2020 | 65244.0                        | 2051 | 38397.0                        |
| 2021 | 64057.2                        | 2052 | 38397.0                        |
| 2022 | 63773.1                        | 2053 | 38397.0                        |
| 2023 | 64218.4                        | 2054 | 38397.0                        |
| 2024 | 64352.8                        | 2055 | 38397.0                        |
| 2025 | 64003.0                        | 2056 | 38397.0                        |
| 2026 | 63168.9                        | 2057 | 38397.0                        |
| 2027 | 61850.7                        | 2058 | 38397.0                        |
| 2028 | 60122.8                        | 2059 | 38397.0                        |

|      |         |      |         |
|------|---------|------|---------|
| 2029 | 58433.4 | 2060 | 38397.0 |
| 2030 | 56857.0 |      |         |

Supplementary Table S9. Input and output flows associated with the mechanical recycling processes of PV waste.

| Phases                | Input        | quantity   | Output                   | quantity   |
|-----------------------|--------------|------------|--------------------------|------------|
| Transportation        | module waste | 1t         | module waste             | 1t         |
|                       | diesel fuel  | 21.49kg/km | NOx                      | 574g       |
|                       |              |            | SO <sub>2</sub>          | 2068.5g    |
|                       |              |            | CO <sub>2</sub>          | 17.8275kg  |
|                       |              |            | methane                  | 136.5g     |
|                       |              |            | total particulate matter | 140g       |
|                       |              |            |                          |            |
| Al frame removal      | module waste | 1t         | Al frame                 | 179kg      |
|                       | electricity  | 5.3kwh     | junction box             | 14.4kg     |
|                       |              |            | copper wire              | 9.767kg    |
|                       |              |            | laminate                 | 745.833kg  |
|                       |              |            | electricity              | 17.8448kwh |
|                       |              |            | solid waste              | 51kg       |
|                       |              |            | chemical waste           | 30.29g     |
|                       |              |            | total particulate matter | 0.03g      |
|                       |              |            |                          |            |
| Knife grinder cutting | laminate     | 745.833kg  | fragment mixture         | 641.63kg   |
|                       | electricity  | 48kwh      | EVA                      | 41kg       |
|                       | water        | 20kg       | general waste            | 56kg       |
|                       |              |            | hazardous waste          | 7.2kg      |
|                       |              |            |                          |            |

---

|                        |                  |          |                  |          |
|------------------------|------------------|----------|------------------|----------|
|                        |                  |          | liquid waste     | 18.6kg   |
|                        |                  |          | NOx              | 108kg    |
|                        |                  |          | SO <sub>2</sub>  | 71.4kg   |
|                        |                  |          | CO <sub>2</sub>  | 144.5kg  |
| Grinding and screening | fragment mixture | 641.63kg | glass fragments  | 505.4kg  |
|                        | electricity      | 3.45kwh  | metal fragments  | 28.89kg  |
|                        |                  |          | solid waste      | 107.34kg |
|                        |                  |          | liquid waste     | 10.11kg  |
|                        |                  |          | ammonia nitrogen | 2.78g    |
|                        |                  |          | total nitrogen   | 113.72g  |
|                        |                  |          | total phosphorus | 0.25g    |

---

Supplementary Table S10. Input and output flows associated with the chemical recycling processes of PV waste.

| Phases           | Input        | quantity   | Output                   | quantity   |
|------------------|--------------|------------|--------------------------|------------|
| Transportation   | module waste | 1t         | module waste             | 1t         |
|                  | diesel fuel  | 21.49kg/km | NOx                      | 574g       |
|                  |              |            | SO <sub>2</sub>          | 2068.5g    |
|                  |              |            | CO <sub>2</sub>          | 17.8275kg  |
|                  |              |            | methane                  | 136.5g     |
|                  |              |            | total particulate matter | 140g       |
|                  |              |            |                          |            |
| Al frame removal | module waste | 1t         | Al frame                 | 179kg      |
|                  | electricity  | 5.3kwh     | junction box             | 14.4kg     |
|                  |              |            | copper wire              | 9.767kg    |
|                  |              |            | laminate                 | 745.833kg  |
|                  |              |            | electricity              | 17.8448kwh |
|                  |              |            | solid waste              | 51kg       |
|                  |              |            | chemical waste           | 30.29g     |
|                  |              |            | total particulate matter | 0.03g      |
| Toluene soak     | laminate     | 745.833kg  | glass                    | 635kg      |
|                  | toluene      | 63.14kg    | back panel               | 33.9kg     |
|                  | water        | 173.2kg    | cells                    | 24.97kg    |



|                     |             |          |                                 |                 |
|---------------------|-------------|----------|---------------------------------|-----------------|
|                     | electricity | 56.76kwh | sludge                          | 18.3kg          |
|                     |             |          | electricity                     | 41.16138<br>kwh |
|                     |             |          | liquid<br>waste                 | 236.34kg        |
|                     |             |          | solid<br>waste                  | 38.92kg         |
|                     |             |          | NOx                             | 2kg             |
|                     |             |          | dichloroe<br>thylene            | 30.82kg         |
|                     |             |          | CO <sub>2</sub>                 | 32.25kg         |
|                     |             |          | methane                         | 50.69kg         |
|                     |             |          | total<br>phosphor<br>ous        | 0.32kg          |
|                     |             |          | total<br>nitrogen               | 6.6kg           |
| Metal<br>extraction | cells       | 24.97kg  | silicon                         | 21.6kg          |
|                     | nitric acid | 6.72kg   | silver                          | 0.46kg          |
|                     | electricity | 32.23kwh | copper                          | 2.91kg          |
|                     | water       | 175.76kg | liquid<br>waste                 | 173.71kg        |
|                     |             |          | NO <sub>x</sub>                 | 108.54kg        |
|                     |             |          | SO <sub>2</sub>                 | 71.4kg          |
|                     |             |          | CO <sub>2</sub>                 | 144.5kg         |
|                     |             |          | total<br>particulat<br>e matter | 9.5g            |

Supplementary Table S11. Input and output flows associated with the thermal recycling processes of PV waste.

| Phases             | Input        | quantity             | Output                   | quantity   |
|--------------------|--------------|----------------------|--------------------------|------------|
| Transportation     | module waste | 1t                   | module waste             | 1t         |
|                    | diesel fuel  | 21.49kg/km           | NOx                      | 382g       |
|                    |              |                      | SO <sub>2</sub>          | 1379g      |
|                    |              |                      | CO <sub>2</sub>          | 67kg       |
|                    |              |                      | methane                  | 91g        |
|                    |              |                      | total particulate matter | 140g       |
|                    |              |                      |                          |            |
| Al frame removal   | module waste | 1t                   | Al frame                 | 179        |
|                    | electricity  | 5.3kwh               | junction box             | 14.4       |
|                    |              |                      | copper wire              | 9.767      |
|                    |              |                      | laminate                 | 745.833    |
|                    |              |                      | electricity              | 17.8448kwh |
|                    |              |                      | solid waste              | 51kg       |
|                    |              |                      | chemical waste           | 30.29g     |
|                    |              |                      | total particulate matter | 0.03g      |
|                    |              |                      |                          |            |
|                    |              |                      |                          |            |
| Heat decomposition | laminate     | 745.833kg            | EVA                      | 45.9kg     |
|                    | electricity  | 35.7kwh              | glass                    | 665kg      |
|                    | nitrogen gas | 154.22m <sup>3</sup> | cells                    | 38.91kg    |
|                    | oxidant      | 165.98m <sup>3</sup> | backplan                 | 14.5       |

|                  |                     |         |                 |         |
|------------------|---------------------|---------|-----------------|---------|
|                  |                     |         | e               |         |
|                  | standard coal       | 80.92kg | solid waste     | 96.75kg |
|                  |                     |         | CO <sub>2</sub> | 32.25kg |
|                  |                     |         | methane         | 50.69kg |
|                  |                     |         | NO <sub>2</sub> | 30.94kg |
|                  |                     |         | SO <sub>2</sub> | 51.17kg |
| Metal extraction | cells               | 38.91kg | Al              | 2.6kg   |
|                  | water               | 309.7kg | silicon         | 34.7kg  |
|                  | electricity         | 56.8kwh | silver          | 0.53kg  |
|                  | nitric acid         | 7.08kg  | copper wire     | 1.08kg  |
|                  | potassium hydroxide | 36.5kg  | sludge          | 50.2kg  |
|                  |                     |         | liquid waste    | 306.1kg |
|                  |                     |         | NO <sub>2</sub> | 30.23kg |
|                  |                     |         | SO <sub>2</sub> | 24.04kg |
|                  |                     |         | CO <sub>2</sub> | 30.82kg |
|                  |                     |         | Nitric oxide    | 0.14kg  |
|                  |                     |         | Ammonia         |         |

Supplementary Table S12. Unit recycling cost of mechanical recycling technology (Unit: US\$/ton).

| Recycling costs              |                     |                            |                     |        |
|------------------------------|---------------------|----------------------------|---------------------|--------|
| Stage-by-stage costs         | Collection          |                            |                     | 110    |
|                              | transportation      | logistics                  |                     | 119.25 |
|                              |                     | emissions                  |                     | 1.86   |
|                              |                     | dismantling                | energy and resource | water  |
|                              |                     |                            | electricity         | 0.40   |
|                              | storage             |                            |                     | 47.2   |
|                              | loss                |                            |                     | 5.5    |
|                              | processing          | materials                  |                     | 0      |
|                              |                     | energy and resource        | water               | 0.01   |
|                              |                     |                            | electricity         | 3.96   |
|                              | disposal            | general solid waste        |                     | 1.13   |
|                              |                     | hazardous solid waste      |                     | 3.20   |
|                              |                     | liquid waste               |                     | 0.03   |
|                              |                     | gas waste                  |                     | 379.95 |
|                              | Whole-process costs | labor                      |                     |        |
| management                   |                     | safety production expenses |                     | 3.5    |
|                              |                     | general management         |                     |        |
| depreciation of fixed assets |                     |                            |                     | 175    |
| operation and maintenance    |                     |                            |                     | 3.5    |
| opportunity cost             |                     |                            |                     | 8.75   |

Supplementary Table S13. Unit recycling cost of chemical technology (Unit: US\$/ton).

| <b>Recycling costs</b>      |                              |                            |             |                                        |
|-----------------------------|------------------------------|----------------------------|-------------|----------------------------------------|
| <b>Stage-by-stage costs</b> | Collection                   |                            |             | 110                                    |
|                             | transportation               | logistics                  |             | 119.25                                 |
|                             |                              | emissions                  |             | 1.875                                  |
|                             |                              |                            |             |                                        |
|                             | dismantling                  | energy and resource        | water       | 0                                      |
|                             |                              |                            | electricity | 0.41                                   |
|                             |                              | storage                    |             | 47.25                                  |
|                             |                              | loss                       |             | 5.5                                    |
|                             |                              |                            |             |                                        |
|                             | processing                   | materials                  | toluene     | 71.49                                  |
|                             |                              |                            | nitric acid | 1.73                                   |
|                             |                              | energy and resource        | water       | 0.16                                   |
|                             |                              |                            | electricity | 6.85                                   |
|                             |                              |                            |             |                                        |
|                             | disposal                     | general solid waste        |             | 0.48                                   |
|                             |                              | hazardous solid waste      |             | 0                                      |
|                             |                              | liquid waste               |             | 0.66                                   |
|                             |                              | sludge                     |             | 0.56                                   |
|                             |                              | gas waste                  |             | 396.94                                 |
|                             |                              |                            |             |                                        |
| <b>whole-process costs</b>  | labor                        |                            |             | per capita Gross National Income (GNI) |
|                             | management                   | safety production expenses |             | 4.25                                   |
|                             |                              | general management         |             | 30% of the labor cost                  |
|                             | depreciation of fixed assets |                            |             | 212.5                                  |
|                             | operation and maintenance    |                            |             | 4.25                                   |
|                             | opportunity cost             |                            |             | 10.63                                  |

Supplementary Table S14. Unit recycling cost of thermal technology (Unit: US\$/ton).

| Recycling costs      |                              |                            |                                        |                       |
|----------------------|------------------------------|----------------------------|----------------------------------------|-----------------------|
| Stage-by-stage costs | Collection                   |                            |                                        | 110.00                |
|                      | transportation               | logistics                  |                                        | 119.25                |
|                      |                              | emissions                  |                                        | 1.88                  |
|                      | dismantling                  | energy and resource        | water                                  | 0.00                  |
|                      |                              |                            | electricity                            | 0.41                  |
|                      |                              | storage                    |                                        | 47.25                 |
|                      |                              | loss                       |                                        | 5.50                  |
|                      | processing                   | materials                  | Nitrogen                               | 12.43                 |
|                      |                              |                            | Oxidant                                | 28.69                 |
|                      |                              |                            | nitric acid                            | 1.83                  |
|                      |                              |                            | sodium hydroxide                       | 10.98                 |
|                      |                              | energy and resource        | water                                  | 0.14                  |
|                      |                              |                            | standard coal                          | 4.38                  |
|                      |                              |                            | electricity                            | 7.12                  |
|                      |                              |                            |                                        |                       |
|                      | disposal                     | general solid waste        |                                        | 0.78                  |
|                      |                              | sludge                     |                                        | 1.54                  |
|                      |                              | liquid waste               |                                        | 0.49                  |
|                      |                              | gas waste                  |                                        | 282.85                |
| whole-process costs  | labor                        |                            | per capita Gross National Income (GNI) |                       |
|                      | management                   | safety production expenses |                                        | 5.25                  |
|                      |                              | general management         |                                        | 30% of the labor cost |
|                      | depreciation of fixed assets |                            |                                        | 262.50                |
|                      | operation and maintenance    |                            |                                        | 5.25                  |
|                      | opportunity cost             |                            |                                        | 13.13                 |

Supplementary Table S15. Unit recycling benefits of three technologies (Unit: US\$/ton).

| <b>Recycling benefits</b> |                  |        |
|---------------------------|------------------|--------|
| mechanical recycling      | Aluminum         | 230.80 |
|                           | Copper           | 55.97  |
|                           | Glass            | 36.19  |
|                           | Silicon          | 0.00   |
|                           | Silver           | 0.00   |
|                           | Metallic mixture | 165.56 |
| Chemical recycling        | Aluminum         | 230.80 |
|                           | Copper           | 72.65  |
|                           | Glass            | 45.47  |
|                           | Silicon          | 129.97 |
|                           | Silver           | 263.61 |
|                           | Metallic mixture | 0.00   |
| Thermal benefits          | Aluminum         | 234.16 |
|                           | Copper           | 62.16  |
|                           | Glass            | 47.61  |
|                           | Silicon          | 208.80 |
|                           | Silver           | 303.73 |
|                           | Metallic mixture | 0.00   |

Supplementary Table S16. PV module learning rate

| GCAM region                     | Learning rate |
|---------------------------------|---------------|
| USA                             | 0.264         |
| Africa_Eastern                  | 0.1           |
| Africa_Northern                 | 0.1           |
| Africa_Southern                 | 0.1           |
| Africa_Western                  | 0.1           |
| Australia_NZ                    | 0.233         |
| Brazil                          | 0.163         |
| Canada                          | 0.233         |
| Central America and Caribbean   | 0.163         |
| Central Asia                    | 0.1           |
| China                           | 0.32          |
| EU-12                           | 0.202         |
| EU-15                           | 0.202         |
| Europe_Eastern                  | 0.1           |
| Europe_Non_EU                   | 0.202         |
| European Free Trade Association | 0.202         |
| India                           | 0.163         |
| Indonesia                       | 0.1           |
| Japan                           | 0.23          |
| Mexico                          | 0.163         |
| Middle East                     | 0.163         |
| Pakistan                        | 0.1           |
| Russia                          | 0.163         |
| South Africa                    | 0.163         |
| South America_Northern          | 0.163         |
| South America_Southern          | 0.163         |
| South Asia                      | 0.1           |
| South Korea                     | 0.233         |
| Southeast Asia                  | 0.163         |



|           |       |
|-----------|-------|
| Argentina | 0.163 |
| Colombia  | 0.163 |

---
